# Supplementary material
Source: PubMed Central journal article supplement (PMC5582631)
Supplement: NIHMS73359-supplement-SI_Guide.pdf [file NIHMS73359-supplement-SI_Guide.pdf]

## SI Guide for

# Very large release of mostly volcanic carbon during the Paleocene-Eocene Thermal Maximum

By

Marcus Gutjahr<sup>1,2\*</sup>, Andy Ridgwell<sup>3,4</sup>, Philip F. Sexton<sup>5</sup>, Eleni Anagnostou<sup>1</sup>, Paul N. Pearson<sup>6</sup>, Heiko Pälike<sup>7</sup>, Richard D. Norris<sup>8</sup>, Ellen Thomas<sup>9,10</sup> and Gavin L. Foster<sup>1</sup>

### **The following supplementary files accompany the main publication:**

- 1) Supplementary Information SI1 containing a detailed account on Earth System Modelling approaches used as a pdf file.
- 2) Supplementary Table S1 containing foraminifera-based stable isotope results, relative sample ages, selected elemental ratios as well as calculated mixed layer pH (as a Microsoft Excel file).
- 3) Supplementary Table S2 containing bulk carbonate stable carbon and oxygen isotope results, also presented alongside relative ages following our two alternative age models (see Methods) (as a Microsoft Excel file).
